# Supplementary material for: Impaired dopamine release in Parkinson’s disease
Source: PubMed Central journal article supplement (PMC10393405; doi:10.1093/brain/awad064), 2023-03-02
Supplement: awad064_supplementary_data.pdf [file awad064_supplementary_data.pdf]

## Supplementary Table 1: Dopamine release defects in PD models (extended)

| Mutation type      | TRANS GENE | MODEL                                                    | DA RELEASE DEFECT?                                                 | METHOD OF DA DETECTION                               | CELL DEATH?                 | MAJOR MOTOR SYMPTOM S?                                       | Ref.           |
|--------------------|------------|----------------------------------------------------------|--------------------------------------------------------------------|------------------------------------------------------|-----------------------------|--------------------------------------------------------------|----------------|
| Autosomal dominant | LRRK2      | Human R1441G BAC transgenic mouse                        | Decreased release                                                  | In vivo microdialysis with nomefensine (DAT blocker) | None by 9-10 months         | Present at 6-12 months                                       | Li, 2009       |
|                    |            | R1441G BAC transgenic mouse                              | None at 6-8 weeks                                                  | Single-pulse & pulse-train FCV                       | Not investigated            | Not investigated                                             | Sanchez, 2014  |
|                    |            | R1441C and G2019S BAC transgenic rat                     | Decreased release at 18-21 months                                  | Single-pulse FCV                                     | None by 18-21 months        | Present at 18-21 months                                      | Sloan, 2016    |
|                    |            | G2019S BAC transgenic mouse                              | Decreased release at 12 months                                     | Single-pulse FCV in brain slices                     | None by 20 months           | None                                                         | Li, 2010       |
|                    |            | Human BAC G2019S mouse                                   | Decreased at 8-10 months                                           | In vivo microdialysis with amphetamine challenge     | None by 22-24 months        | None by 7-8 months                                           | Melrose, 2010  |
|                    |            | G2019S KI mouse                                          | Decreased release and basal levels at 12 months (but not 6 months) | In vivo microdialysis with amphetamine challenge     | None by 20 months           | None by 12 months                                            | Yue, 2015      |
|                    |            | Midbrain-specific (PitX3) overexpression of G2019S mouse | Decreased release at 12 months but not 1 month                     | Single-pulse FCV in brain slices                     | None by 20 months           | None by 18 months                                            | Liu, 2015      |
|                    |            | G2019S KI mouse                                          | None at 12 months                                                  | In vivo microdialysis with 10 and 20 mM KCl          | None by 19 months           | Not investigated                                             | Longo, 2017    |
|                    |            | G2019S KI mouse                                          | Increased release at 3 months                                      | Single pulse FCV in brain slices                     | Not investigated            | Not investigated                                             | Volta, 2017    |
|                    |            | iPSC-derived DANs with I2020T                            | Decreased release at 86 DIV                                        | Evoked with 56 mM KCl coupled to HPLC-ECD            | n/a                         | n/a                                                          | Ohta, 2015     |
|                    |            | iPSC-derived DANs with I723V and M23497T                 | Decreased release at 37 DIV                                        | Evoked with 56 mM KCl detected with ELISA            | n/a                         | n/a                                                          | Luo, 2020      |
|                    | VPS35      | D620N KI mouse                                           | Decreased release by 20-28 weeks                                   | In vivo microdialysis with 120 mM KCl                | None by 70 weeks            | None by 12 weeks                                             | Ishizu, 2016   |
|                    |            | D620N KI mouse                                           | Increased release at 3 months                                      | Single-pulse FCV in brain slices                     | None by 3 months            | None by 3 months                                             | Cataldi, 2018  |
|                    | SNCA       | BAC human SNCA overexpression mouse                      | Decreased release by 3 months and present until atleast 18 months  | Single-pulse FCV in brain slices                     | Present at 18 months        | Present at 18 months                                         | Janezic, 2013  |
|                    |            | A30P and SNCA overexpression AAV rat                     | Decreased release 9 weeks post injection for WT OVX but not A30P   | Amperometry with 70 mM KCl                           | None                        | Present 4 months post injection (WT overexpression not A30P) | Gaugler, 2012  |
|                    |            | AAV human SNCA rat                                       | Decreased release                                                  | In vivo amperometry with KCl                         | Present                     | Not investigated                                             | Lundblad, 2012 |
|                    |            | SNCA overexpression mouse                                | Increased release early, later normalized                          | In vivo microdialysis                                | Present at 14 months of age | Present at 14 months of age                                  | Lam, 2011      |
|                    |            | Midbrain-specific (PitX3) expression of A53T mouse       | Decreased release at 3-4 months                                    | In vivo microdialysis and FCV in brain slices        | Present                     | Present, severe by 12 months                                 | Lin, 2012      |

|                            |        |                                  |                                             |                                               |                                 |                                 |                       |
|----------------------------|--------|----------------------------------|---------------------------------------------|-----------------------------------------------|---------------------------------|---------------------------------|-----------------------|
|                            |        | Human A53T overexpression mouse  | <b>Altered release</b> at 6-12 months       | <b>FCV</b> in brain slices                    | Not investigated                | Not investigated                | <i>Platt, 2012</i>    |
|                            |        | A30P BAC transgenic mouse        | <b>Decreased release</b>                    | <b>FCV</b> in brain slices                    | <b>None</b> by 18 months of age | <b>None</b>                     | <i>Taylor, 2014</i>   |
|                            |        | Human A30P mouse                 | <b>Decreased release</b>                    | <b>FCV</b> in brain slices                    | <b>None</b>                     | <b>Present</b> by 6 months      | <i>Yavich, 2005</i>   |
| <b>Autosomal recessive</b> | Parkin | Parkin KO mouse                  | <b>Decreased release</b> between 3 -6months | In vivo <b>voltammetry</b>                    | <b>None</b> by 12 months        | <b>None</b> by 12 months        | <i>Oyama, 2010</i>    |
|                            |        | Parkin KO mouse                  | <b>Decreased release</b> between 8-16 weeks | Single pulse <b>amperometry</b>               | Not investigated                | Not investigated                | <i>Kitada, 2009</i>   |
|                            |        | Parkin KO mouse                  | <b>Decreased release</b>                    | In vivo <b>microdialysis</b>                  | <b>None</b> by 24 months        | <b>Present</b>                  | <i>Goldberg, 2003</i> |
|                            |        | Parkin KO mouse                  | <b>None</b> at 6-8 weeks                    | Single pulse <b>FCV</b>                       | Not investigated                | Not investigated                | <i>Sanchez, 2014</i>  |
|                            |        | Parkin KO rat                    | <b>None</b>                                 | In vivo <b>microdialysis</b> with KCl         | <b>None</b>                     | <b>None</b>                     | <i>Creed, 2019</i>    |
|                            |        | Parkin KO iPSC-derived DANs      | <b>Increased release</b>                    | Evoked with KCl coupled to HPLC-ECD           | n/a                             | n/a                             | <i>Jiang, 2012</i>    |
|                            | Pink1  | Pink1 KO mouse                   | <b>Decreased release</b>                    | <b>Amperometry</b>                            | <b>None</b>                     | Not investigated                | <i>Kitada, 2007</i>   |
|                            |        | Pink1 KO mouse                   | <b>Decreased release</b>                    | <b>FCV</b> in brain slices                    | <b>None</b> by 14 months        | Not investigated                | <i>Zhi, 2019</i>      |
|                            |        | Pink1 KO mouse                   | <b>None</b> at 6-8 weeks                    | Single pulse <b>FCV</b> +/- Norefensine       | Not investigated                | Not investigated                | <i>Sanchez, 2014</i>  |
|                            |        | Pink1 KO mouse                   | <b>Increased release</b>                    | In vivo <b>microdialysis</b> with KCl         | <b>Present</b> by 8 months      | <b>Present</b> by 8 months      | <i>Creed, 2019</i>    |
|                            | DJ-1   | DJ-1 KO rat                      | <b>None</b>                                 | In vivo <b>microdialysis</b> with KCl         | <b>Present</b> by 8 months      | <b>Present</b> by 8 months      | <i>Creed, 2019</i>    |
|                            |        | DJ-1 KO mouse                    | <b>Decreased release</b>                    | <b>Amperometry</b> with norefensine challenge | <b>None</b>                     | <b>Present</b>                  | <i>Goldberg, 2005</i> |
|                            |        | DJ-1 KO mouse                    | <b>None</b> at 6-8 week                     | Single pulse <b>FCV</b> +/- Norefensine       | Not investigated                | Not investigated                | <i>Sanchez, 2014</i>  |
| DJ-1 KO mouse              |        | <b>None</b> at 6 months          | In vivo <b>microdialysis</b> with KCl       | <b>None</b> by 28 months                      | <b>Present</b>                  | <i>Chandran, 2008</i>           |                       |
| <b>Risk Factor</b>         | GBA    | Wildtype mice with CBE treatment | <b>Decreased release</b>                    | In vivo <b>microdialysis</b>                  | Not investigated                | <b>Present</b> (data not shown) | <i>Ginns, 2014</i>    |
|                            |        | iPSC-derived DANs with N370S     | <b>Decreased release</b>                    | Evoked with KCl coupled to HPLC-ECD           | n/a                             | n/a                             | <i>Woodard, 2014</i>  |
